# Supplementary material
Source: PubMed Central journal article supplement (PMC6070098)
Supplement: dey221_supplementary_table_si.pdf [file dey221_supplementary_table_si.pdf]

**Supplementary Table S1** Semen parameters from the 20 healthy volunteers.

| Parameters                                        | Minimum | 25% Percentile | Median | 75% Percentile | Maximum | Mean  | Std. error |
|---------------------------------------------------|---------|----------------|--------|----------------|---------|-------|------------|
| Progressive motility (%)                          | 47.59   | 62.94          | 77.86  | 85.08          | 93.54   | 74.47 | 3.02       |
| Total motility (%)                                | 75.72   | 86.65          | 93.39  | 95.76          | 98.05   | 91.04 | 1.47       |
| Distance curved line (DCL; mm)                    | 19.17   | 26.19          | 29.85  | 34.14          | 43.14   | 30.39 | 1.42       |
| Distance average path (DAP; mm)                   | 12.75   | 17.47          | 19.78  | 22.12          | 27.39   | 19.88 | 0.78       |
| Distance straight line (DSL; mm)                  | 9.460   | 12.41          | 14.00  | 15.74          | 20.60   | 14.18 | 0.59       |
| Curvilinear velocity (VCL; mm/s)                  | 44.08   | 60.51          | 68.94  | 79.79          | 97.40   | 70.26 | 3.39       |
| Average path velocity (VAP; mm/s)                 | 29.40   | 41.13          | 44.72  | 52.85          | 61.29   | 46.00 | 1.84       |
| Straight-line velocity (VSL; mm/s)                | 21.86   | 28.42          | 33.05  | 36.47          | 46.09   | 32.83 | 1.33       |
| Linearity (LIN; VSL/VCL)                          | 0.36    | 0.41           | 0.48   | 0.51           | 0.59    | 0.47  | 0.013      |
| Straightness (STR; VSL/VAP)                       | 0.62    | 0.67           | 0.70   | 0.74           | 0.82    | 0.71  | 0.011      |
| Wobble (WOB; VAP/VCL)                             | 0.57    | 0.61           | 0.67   | 0.70           | 0.72    | 0.66  | 0.011      |
| Beat cross frequency BCF (Hz)                     | 21.97   | 23.66          | 25.93  | 26.68          | 28.83   | 25.46 | 0.42       |
| Amplitude of lateral head displacement ALH (mm)   | 1.450   | 2.388          | 2.765  | 3.040          | 4.000   | 2.733 | 0.14       |
| Average orientation change of the head (AOC; deg) | 16.39   | 20.35          | 23.22  | 24.79          | 27.87   | 22.74 | 0.63       |
